# Supplementary material
Source: PubMed Central journal article supplement (PMC534615)
Supplement: nar_32_20_6001__1.pdf [file nar_32_20_6001__1.pdf]

## Supplementary materials

**Supplementary material 1.** a) Names, sequences and positions (in relation to the human mitochondrial DNA) of primers that were used for the determination of the sequence of the 3'-ends of selected human mitochondrial RNAs; b) The expected lengths of the final PCR products for analyzed mRNAs with and without long poly(A) tails

a)

|                                         | Examined mitochondrial RNA |                  |                    |                    |                 |
|-----------------------------------------|----------------------------|------------------|--------------------|--------------------|-----------------|
|                                         | ND3                        | CYTB             | ATP6/8             | COXIII             | 12S rRNA        |
| <b>primer for reverse transcription</b> | <i>ND3-RT</i>              | <i>CYTB-RT</i>   | <i>ATP6/8-RT</i>   | <i>COXIII-RT</i>   | <i>12S-RT</i>   |
| <b>external forward primer</b>          | <i>ND3 LP-F</i>            | <i>CYTB LP-F</i> | <i>APT6/8 LP-F</i> | <i>COXIII LP-F</i> | <i>12S LP-F</i> |
| <b>external reverse primer</b>          | <i>ND3 LP-R</i>            | <i>CYTB LP-R</i> | <i>APT6/8 LP-R</i> | <i>COXIII LP-R</i> | <i>12S LP-R</i> |
| <b>nested forward primer</b>            | <i>ND3 SP-F</i>            | <i>CYTB SP-F</i> | <i>APT6/8 SP-F</i> | <i>COXIII SP-F</i> | <i>12S SP-F</i> |
| <b>nested reverse primer</b>            | <i>ND3 SP-R</i>            | <i>CYTB SP-R</i> | <i>APT6/8 SP-R</i> | <i>COXIII SP-R</i> | <i>12S SP-R</i> |

| Name of the primer | Sequence of the primer      | Position of the primer in human mtDNA |
|--------------------|-----------------------------|---------------------------------------|
| <i>ND3-RT</i>      | 5'-GAAGCCGCACTCGTAAGGGG-3'  | 10181 - 10162                         |
| <i>ND3 LP-F</i>    | 5'-CCTTTTACCCCTACCATGAG-3'  | 10271 - 10290                         |
| <i>ND3 LP-R</i>    | 5'-ATGTAGCCGTTGAGTTGTGG-3'  | 10150 - 10131                         |
| <i>ND3 SP-F</i>    | 5'-AACTAACCTGCCACTAATAG-3'  | 10301 - 10320                         |
| <i>ND3 SP-R</i>    | 5'-TAGTAGTAAGGCTAGGAGGG-3'  | 10109 - 10090                         |
| <i>CYTB-RT</i>     | 5'-GTCTGGTGAGTAGTGCATGG-3'  | 14920 - 14901                         |
| <i>CYTB LP-F</i>   | 5'-CAGACCTCCTCGTTCTAACCC-3' | 15735 - 15754                         |
| <i>CYTB LP-R</i>   | 5'-ATAGTCCTGTGGTGATTTGG-3'  | 14894 - 14875                         |
| <i>CYTB SP-F</i>   | 5'-AGGACAACCAGTAAGCTACC-3'  | 15763 - 15782                         |
| <i>CYTB SP-R</i>   | 5'-TGAGCCGAAGTTTCATCATG-3'  | 14851 - 14832                         |
| <i>ATP6/8-RT</i>   | 5'-GGGCAATGAATGAAGCGAAC-3'  | 8560 - 8541                           |
| <i>APT6/8 LP-F</i> | 5'-CATTCAACCAATAGCCCTGG-3'  | 8976 - 8995                           |
| <i>APT6/8 LP-R</i> | 5'-GTTCAATTTGGTTCTCAGGG-3'  | 8532 - 8513                           |
| <i>APT6/8 SP-F</i> | 5'-CGCCTAACCGCTAACATTAC-3'  | 9001 - 9020                           |
| <i>APT6/8 SP-R</i> | 5'-TTTATGGGCTTTGGTGAGGG-3'  | 8493 - 8474                           |
| <i>COXIII-RT</i>   | 5'-TTACATCGCGCCATCATTGG-3'  | 9390 - 9371                           |
| <i>COXIII LP-F</i> | 5'-GCTTCCACGGACTTCACGTC-3'  | 9811 - 9830                           |
| <i>COXIII LP-R</i> | 5'-GTGTTGGTTAGTAGGCCTAG-3'  | 9358 - 9339                           |
| <i>COXIII SP-F</i> | 5'-TCACTATCTGCTTCATCCGC-3'  | 9850 - 9869                           |
| <i>COXIII SP-R</i> | 5'-ATGAGGAGCGTTATGGAGTG-3'  | 9337 - 9318                           |
| <i>12S-RT</i>      | 5'-TGGCTGGCAGAAATTGACC-3'   | 896 - 877                             |
| <i>12S LP-F</i>    | 5'-GAGTGCTTAGTTGAACAGGG-3'  | 1445 - 1464                           |
| <i>12S LP-R</i>    | 5'-AACCTGGGGTTAGTATAGC-3'   | 876 - 857                             |
| <i>12S SP-F</i>    | 5'-ACCCTCCTCAAGTATACTTC-3'  | 1492 - 1511                           |
| <i>12S SP-R</i>    | 5'-AATCACTGCTGTTCCCGTG-3'   | 825 - 806                             |

b)

| RNA            | Length of final PCRproduct [-poly(A)] | Length of final PCRproduct [+poly(A) 60 bp] |
|----------------|---------------------------------------|---------------------------------------------|
| <b>ND3</b>     | 155 bp                                | ~215 bp                                     |
| <b>CYTB</b>    | 228 bp                                | ~288 bp                                     |
| <b>ATP6/8</b>  | 335 bp                                | ~395 bp                                     |
| <b>COX III</b> | 271 bp                                | ~331 bp                                     |
| <b>12 S</b>    | 287 bp                                | -                                           |

**Supplementary material 2. Genomic organization of the gene coding for the putative hmtPAP.** a) Exons are depicted schematically as grey boxes and designated e1-e9. Introns are denoted i1-i9. The scale in the top illustrates the genomic region of approximately 35.5 kb, that is covered by the gene; b) *atg* indicates an initiation codon. Asterisk indicates the position of termination codon TGA. Two first and two last base pairs of each intron are underlined in order to emphasize that all exon/intron junctions match the criteria of GT-AG rule.

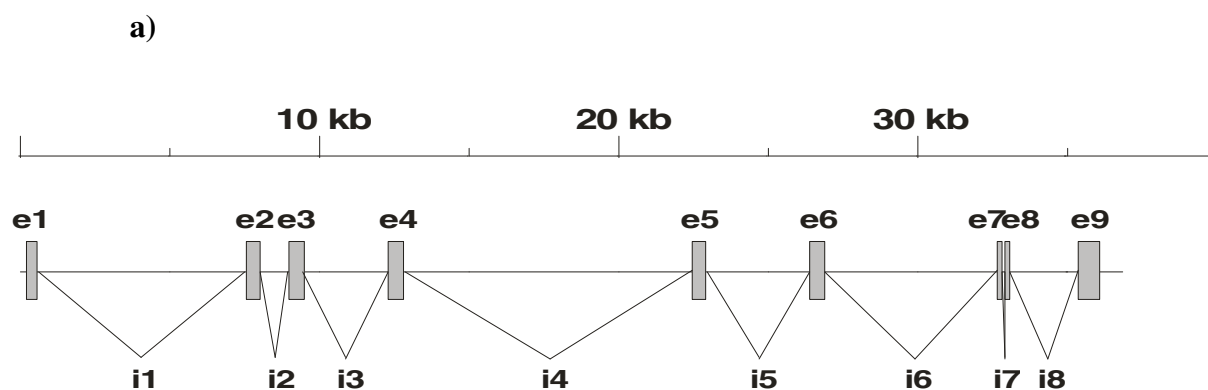

b)

| Number | Exons       |                    |                    | Introns     |                     |                    |
|--------|-------------|--------------------|--------------------|-------------|---------------------|--------------------|
|        | length (bp) | sequence of 5'-end | sequence of 3'-end | Length (bp) | sequence of 5'-end  | sequence of 3'-end |
| 1      | 157         | <i>atg</i> gcggttc | gtggagacag         | 7478        | <u>GT</u> gatg'gcgc | tcgttcat <u>AG</u> |
| 2      | 173         | gctttgaaga         | tgaaagcttt         | 1017        | <u>GT</u> aagtattt  | tttggtat <u>AG</u> |
| 3      | 225         | ggtctctatg         | tgcagaaagt         | 3198        | <u>GT</u> aagttttt  | ggctagct <u>AG</u> |
| 4      | 225         | atagacgatc         | cgctcacaag         | 10167       | <u>GT</u> aagtctat  | tatttttc <u>AG</u> |
| 5      | 212         | atctcaggaa         | cgaacaatag         | 3806        | <u>GT</u> atgaccgc  | tttttga <u>AG</u>  |
| 6      | 227         | gattgccttg         | accctagcag         | 6180        | <u>GT</u> aagactag  | tgtgttta <u>AG</u> |
| 7      | 93          | atgcagaaga         | gaaacattag         | 81          | <u>GT</u> aagtgtca  | tttcttac <u>AG</u> |
| 8      | 74          | aattactact         | tattcgacag         | 1992        | <u>GT</u> aataatg   | taatctat <u>AG</u> |
| 9      | 360         | ggaagggagc         | tactcagaca*        | -           | -                   | -                  |
